# Supplementary material for: Details of the cooperative binding of piperlongumine with rat serum albumin obtained by spectroscopic and computational analyses
Source: PubMed Central journal article supplement (PMC6821919; doi:10.1038/s41598-019-52187-5), 2019-10-30
Supplement: 41598_2019_52187_MOESM1_ESM.pdf [file 41598_2019_52187_MOESM1_ESM.pdf]

# Details of the cooperative binding of piperlongumine with rat serum albumin obtained by spectroscopic and computational analyses

Ana Paula Ribeiro Povinelli<sup>1†</sup>, Gabriel Zazeri<sup>1†</sup>, Marcelo de Freitas Lima<sup>2</sup> and Marinônio Lopes Cornélio<sup>1,\*</sup>

<sup>1</sup> Departamento de Física, Instituto de Biociências, Letras e Ciências Exatas (IBILCE), UNESP, Rua Cristovão Colombo 2265, CEP 15054-000, São José do Rio Preto, SP, Brazil; ana.povinelli@unesp.br (A.P.R.P.), gabriel.zazeri@unesp.br (G.Z.)

<sup>2</sup> Departamento de Química, Instituto de Biociências, Letras e Ciências Exatas (IBILCE), UNESP, Rua Cristovão Colombo 2265, CEP 15054-000, São José do Rio Preto, SP, Brazil. marcelo.f.lima@unesp.br

\* Correspondence: [m.cornelio@unesp.br](mailto:m.cornelio@unesp.br)

† These authors contributed equally to this work

```

HSA DAHKSEVAHRFKDLGEEFKALVLIIFAQYLQCCPFEDHVKLVNEVTEFAKTCVADESAE 60
RSA EAHKSEIAHRFKDLGEQHFKGLVLIAFSQYLQKCPYEEHIKLVQEVTFDAKTCVADENAE 60
:****:*****:*.*****:****:****:****:****:****:****:****:****:****
:****:*****:*.*****:****:****:****:****:****:****:****:****:****

HSA NCDKSLHTLFGDKLCTVATLRETYGEMADCCAKQEPERNECFLQHKDDNPNLPRPVRPEV 120
RSA NCDKSIHTLFGDKLCAIPKLRDNYGELADCCAKQEPERNECFLQHKDDNPNLPPFORPEA 120
*****:*****:*.*****:****:****:****:****:****:****:****:****:****
*****:*****:*.*****:****:****:****:****:****:****:****:****:****

HSA DVMCTAFHDNEETFLKKYLYE IARRHPYFYAPELLFFAKRYKAAFTECCQAADKAAACLLP 180
RSA EAMCTSFQENPTSFLGHYLHEVARRHPYFYAPPELLYYAEKYNEVLTQCCTESDKAACLTPT 180
:****:****:*.*****:****:****:****:****:****:****:****:****:****
:****:****:*.*****:****:****:****:****:****:****:****:****:****

HSA KLDELRLDEGKASSAKQRLKCASLQKFGERAFKAWAVARLSQRFPKAEFAEVSKLVTDLTK 240
RSA KLDVAVKEKALVAAVRQRMKCSSMQRFGERAFKAWAVARMSQRFPAEFAEITKLATDVTK 240
****:****:*.*****:****:****:****:****:****:****:****:****:****
****:****:*.*****:****:****:****:****:****:****:****:****:****

HSA VHTECCHGDLLECADDRADLAKYICENQDSISSKLEKCEKPLEKSHCIAEVENDEMPA 300
RSA INKECCHGDLLECADDRADLAKYMCENQATISSKLAQCCDKPVLQKSQLAEIEHDNIPA 300
:*.*****:****:****:****:****:****:****:****:****:****:****:****
:*.*****:****:****:****:****:****:****:****:****:****:****:****

HSA DLPSLAADFVESKDVCKNYAEAKDVFLGMFLYEYARRHPDYSVLLLLRLAKTYETTLEKC 360
RSA DLPSIAADFVEDKEVCKNYAEAKDVFLGTFLYEYSRRHPDYSVLLLLRLAKKYEATLEKC 360
****:****:*.*****:****:****:****:****:****:****:****:****:****
****:****:*.*****:****:****:****:****:****:****:****:****:****

HSA CAAADPHECYAKVFDEFKPLVEEPQNLIKQNCLELFEQLGEYKFNALLVRYTKKVPQVST 420
RSA CAEGDPPACYGTVLAEFQPLVEEPKNLVKTNCELYEKLGEYGFQNAVLRVYTKAPQVST 420
**.* **.*:*.*****:****:****:****:****:****:****:****:****:****
**.* **.*:*.*****:****:****:****:****:****:****:****:****:****

HSA PTLVEVSRNLGKVGSKCKHPEAKRMPCAEDYLSVVLNQLCVLHEKTPVSDRVTKCCTES 480
RSA PTLVEAARNLGRVGTCCCTLPEAQLPCVEDYLSAILNRLCVLHEKTPVSEKVTKCCSGS 480
*****:****:****:****:****:****:****:****:****:****:****:****:****
*****:****:****:****:****:****:****:****:****:****:****:****:****

HSA LVNRRPCFSALEVDETYVPKEFNAETFTPHADICTLSEKERQIKKQTALVELVKHKPKAT 540
RSA LVERRPCFSALTVDETYVPKEFKAETFTFHSDICTLPDKEKQIKKQTALAEVLVKHKPKAT 540
**:***** *****:*****:*****:*****:*****:*****:*****:*****
**:***** *****:*****:*****:*****:*****:*****:*****:*****

HSA KEQLKAVMDDFAAFVEKCKCKADDKETCFAEEGKLVAAASQAALGL 585
RSA EDQLKTVMGDFAQFVDKCKCAADKDNCFATEGPNLVARSKEALA- 584
:****:****:****:****:****:****:****:****:****:****:****:****
:****:****:****:****:****:****:****:****:****:****:****:****

```

Figure S1: Sequence alignment of Human Serum Albumin (HSA) and Rat Serum Albumin (RSA) with 73% of similarity. Asterisk indicates positions which have a single, fully conserved residue. Colon indicates conservation between groups of strongly similar properties. Period indicates conservation between groups of weakly similar properties.

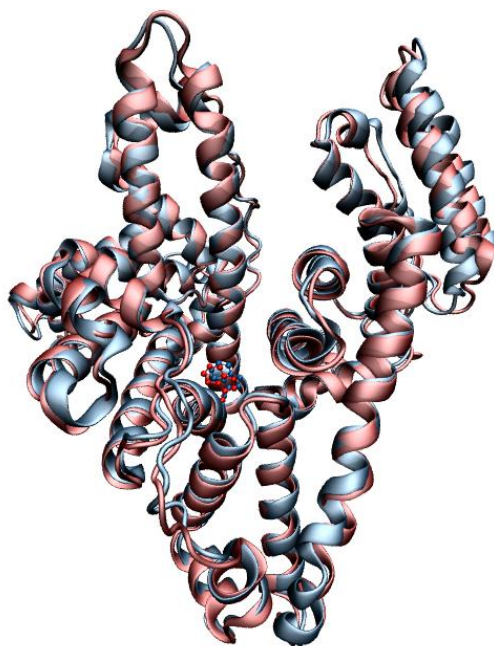

Figure S2: Structural alignment of RSA (blue) and HSA-PDB 1AO6 (red). In “ball and stick” style TRP214 of RSA (blue) and HSA (red).

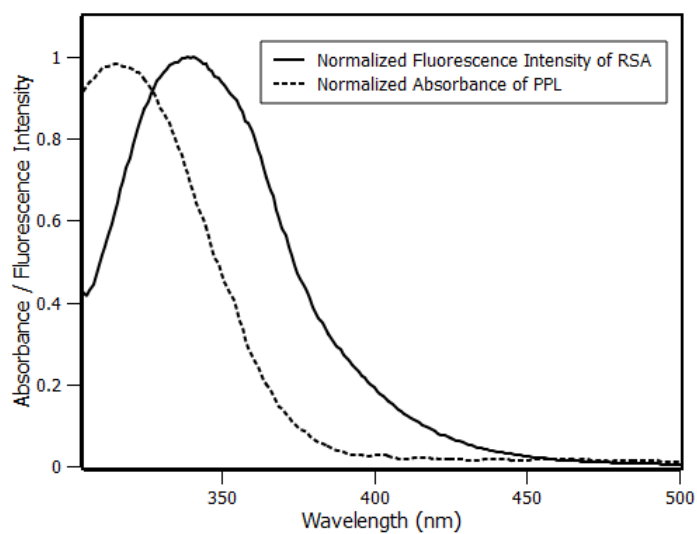

Figure S3: Spectra of absorption of PPL and emission of RSA in the range from 305 to 500 nm.

Time-dependent fluorescence decays (Figure S4) was fitted using multiexponential decay (Equation 10). The best fit was obtained with two lifetimes  $\tau_1$  and  $\tau_2$  (Table S1). The average time ( $\tau_{\text{avg}}$ ) was calculated by Equation 11 considering the contributions,  $\alpha_1$  and  $\alpha_2$ , of each component.

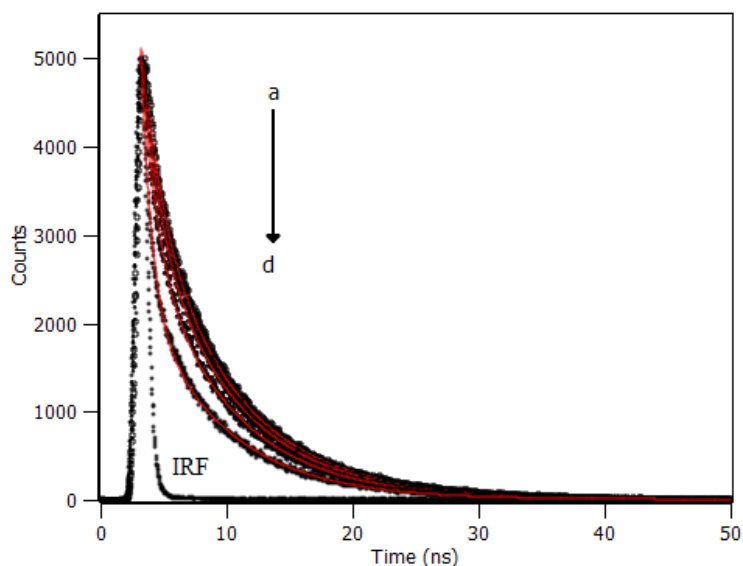

Figure S4: Time-dependent fluorescence decay of (a) RSA and (→d) in the RSA:PPL stoichiometries 1:1, 1:3, 1:8. [RSA] =  $4\mu\text{M}$ ,  $T = 298\text{K}$  and  $\lambda_{\text{exc}} = 295\text{nm}$ . IRF indicates the instrument response function and the red solid line is the biexponential fitting for each decay.

Table S1: Tryptophan lifetime in different stoichiometries RSA:PPL obtained through biexponential decay.

| RSA : PPL | $\alpha_1$ | $\tau_1$ (ns) | $\alpha_2$ | $\tau_2$ (ns) | $\tau_{\text{avg}}$ (ns) | $\chi^2$ |
|-----------|------------|---------------|------------|---------------|--------------------------|----------|
| 1:0       | 0.08       | 1.51          | 0.92       | 6.81          | 6.71                     | 1.10     |
| 1:1       | 0.09       | 1.33          | 0.91       | 6.74          | 6.64                     | 1.12     |
| 1:3       | 0.10       | 1.11          | 0.90       | 6.60          | 6.50                     | 1.16     |
| 1:8       | 0.13       | 0.81          | 0.86       | 6.39          | 6.28                     | 1.20     |

The binding constants were calculated through the linear adjustments of the double-log plots.

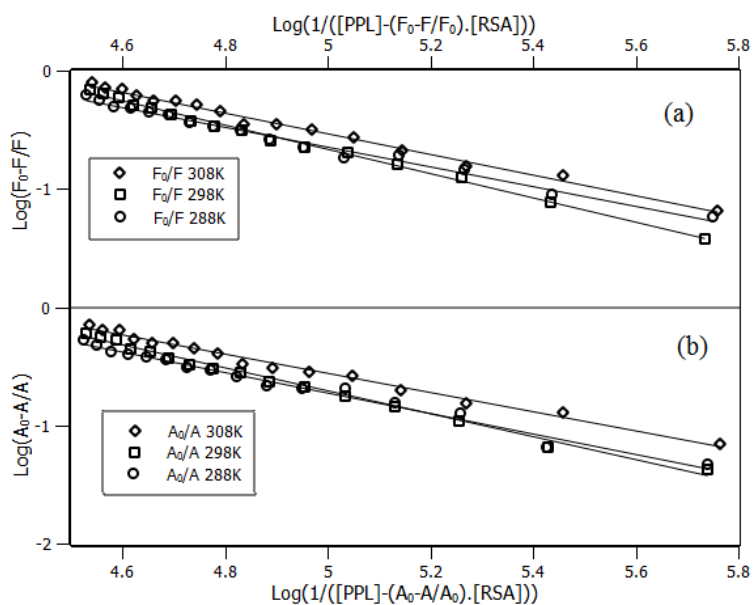

Figure S5: Double-log plots using (a) the fluorescence intensity at 340 nm and (b) the areas below the spectra (from 305 to 400 nm).

Table S2: Secondary Structures percentages obtained experimentally from Circular Dichroism (CD) and obtained computationally from Molecular Dynamics (MD). Circular Dichroism experiments were carried out at the stoichiometry RSA:PPL (1:8) at 288K, 298K and 308K. Molecular Dynamics were performed for RSA, RSA+PPL in site 1 (MD 1) and RSA+PPL in site 2 (MD 2) at 298K .

| Sample                     | $\alpha$ -helix(%) | Turns(%) | Random Coil(%) |
|----------------------------|--------------------|----------|----------------|
| <b>RSA 288K – CD</b>       | 63                 | 17       | 16             |
| <b>RSA 298K – CD</b>       | 63                 | 17       | 17             |
| <b>RSA 298K – MD</b>       | 65                 | 17       | 16             |
| <b>RSA 308K – CD</b>       | 62                 | 17       | 19             |
| <b>RSA+PPL 288K – CD</b>   | 61                 | 19       | 15             |
| <b>RSA+PPL 298K – CD</b>   | 61                 | 18       | 18             |
| <b>RSA+PPL 298K – MD 1</b> | 64                 | 19       | 17             |
| <b>RSA+PPL 298K – MD 2</b> | 64                 | 16       | 19             |
| <b>RSA+PPL 308K – CD</b>   | 60                 | 19       | 18             |

The stability of RSA structure along 50 ns of molecular dynamics was verified by means of the root mean square deviation (RMSD) with free RSA, PPL in site 1 and PPL in site 2.

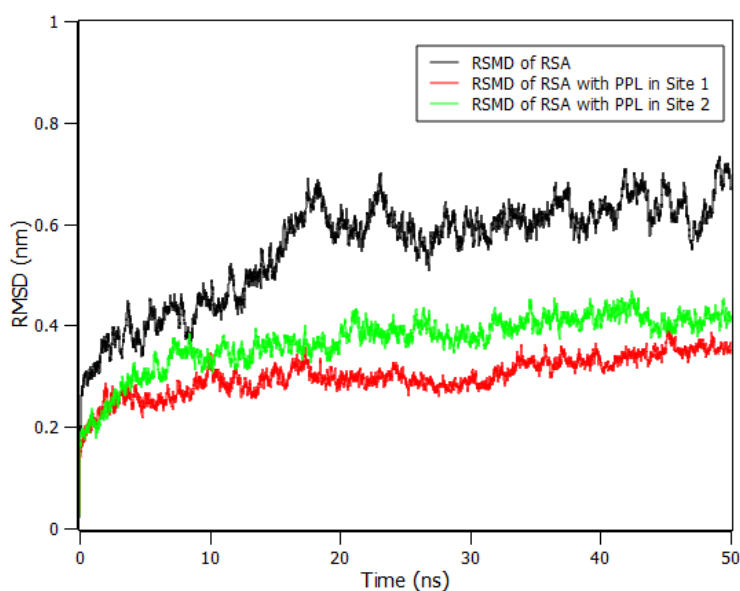

Figure S6: Root mean square deviation (RMSD) calculated for the backbone of free RSA(black), RSA with PPL in site 1 (red) and RSA with PPL in site 2 (green).

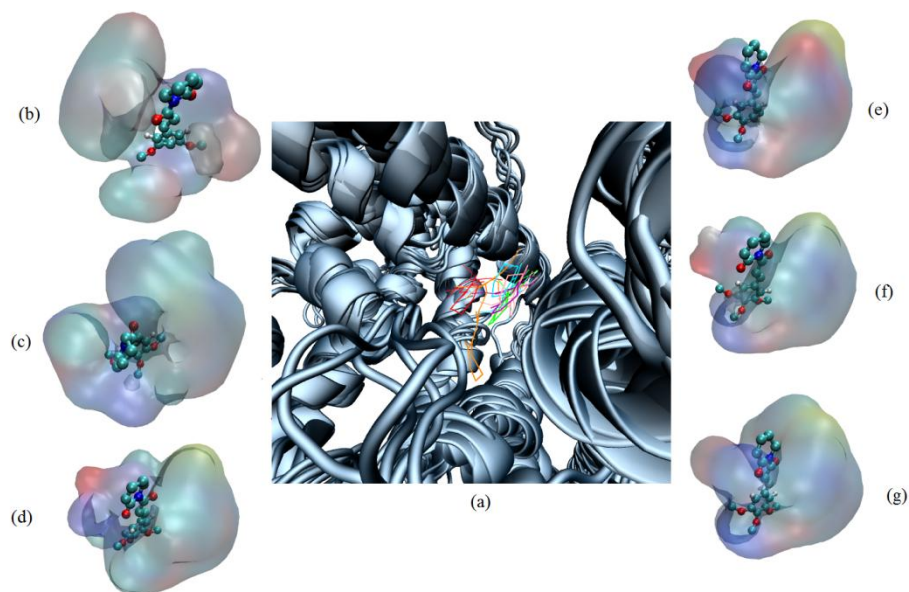

Figure S7 : (a) Structural conformation of the complex RSA-PPL, at site 1, from 0 to 50 ns, with intervals of 10 ns. (b → g) conformational configuration of the RSA-PPL microenvironment (site 1) with the participation of amino acids (quicksurf) at a distance of 8 Å, during 50ns at 10ns intervals.

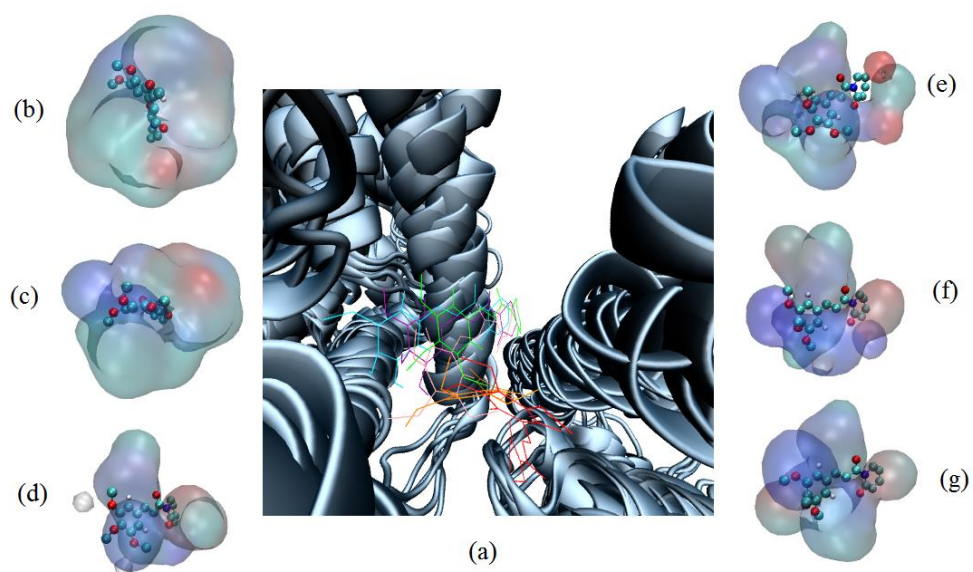

Figure S8 : (a) Structural conformation of the complex RSA-PPL, at site 2, from 0 to 50 ns, with intervals of 10 ns. (b → g) conformational configuration of the RSA-PPL microenvironment (site 2) with the participation of amino acids (quicksurf) at a distance of 8 Å, during 50ns at 10ns intervals.

Molecular dynamics analyses also showed the stability of secondary structures present in site 1 and site 2 microenvironment.

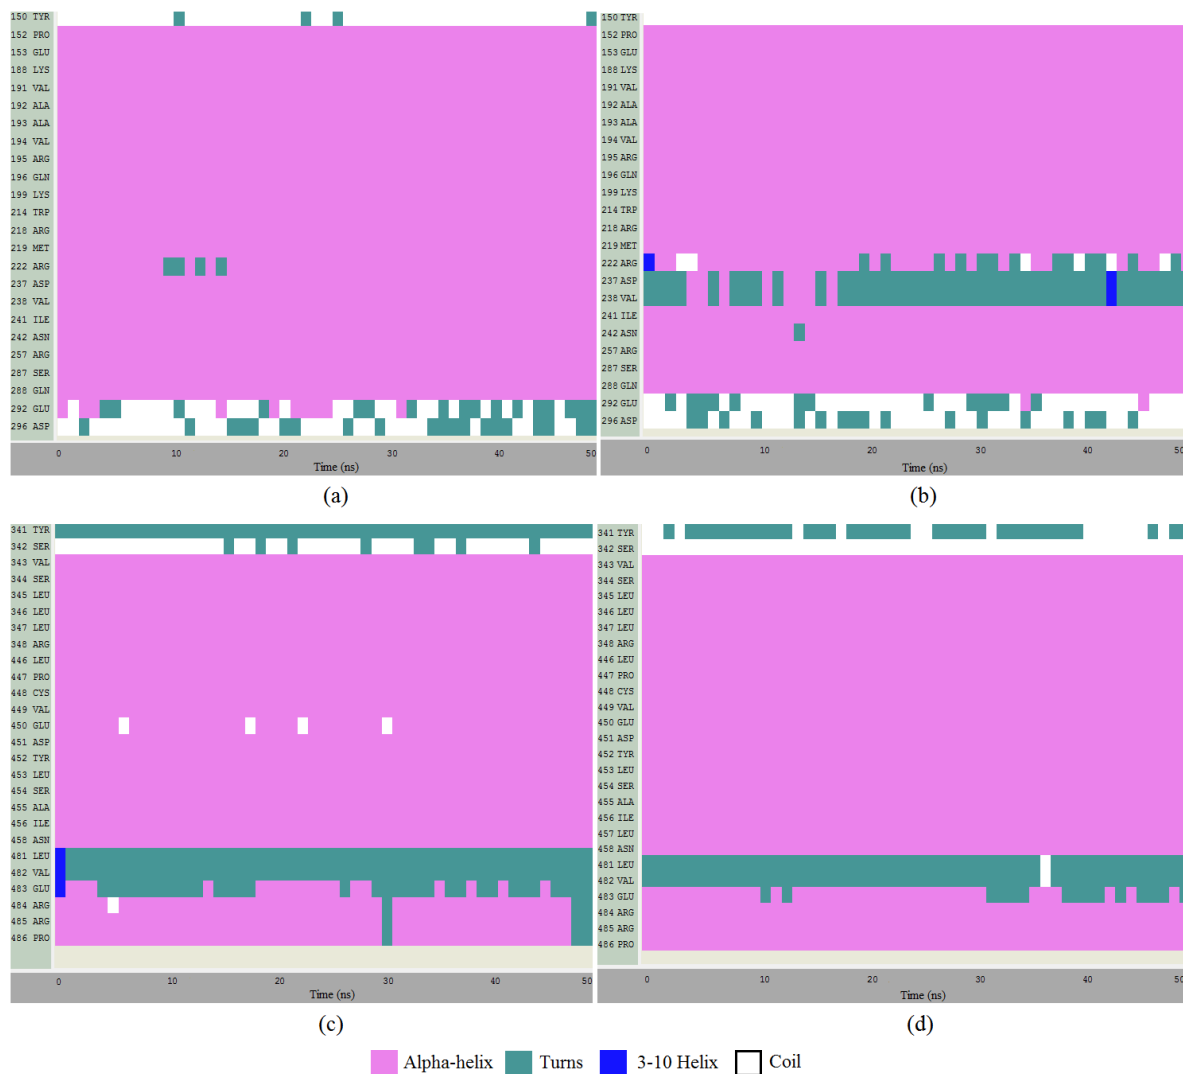

Figure S9: Secondary structure of amino acids that compose site 1 during 50 ns of MD: (a) free RSA, (b) RSA with PPL. Secondary structure of amino acids that compose site 2 during the 50 ns of MD: (c) free RSA and (d) RSA with PPL.

Table S3: Distance between COG of PPL and COG of the amino acid residues that compose the microenvironment of Site 1 and Site 2 in Molecular Docking.

| Site 1  |               | Site 2  |               |
|---------|---------------|---------|---------------|
| Residue | Distance (nm) | Residue | Distance (nm) |
| Trp214  | 1.18          | Trp214  | 0.50          |
| Cys448  | 1.03          | Asn458  | 0.99          |
| Leu446  | 1.35          | Leu481  | 1.14          |
| Arg222  | 1.02          | Ser454  | 0.58          |
| Ala291  | 0.77          | Arg485  | 0.71          |
| Ala443  | 1.47          | Leu347  | 0.86          |
| Gln444  | 1.22          | Val343  | 0.54          |
| Glu292  | 0.69          | Phe211  | 0.98          |
| Met219  | 1.05          | Val482  | 0.94          |
| Pro447  | 0.90          | Met203  | 1.22          |
| Ala192  | 0.85          | Asp 451 | 0.47          |
| Gln196  | 1.01          | -       | -             |
| Asn242  | 0.92          | -       | -             |
| Tyr150  | 0.89          | -       | -             |

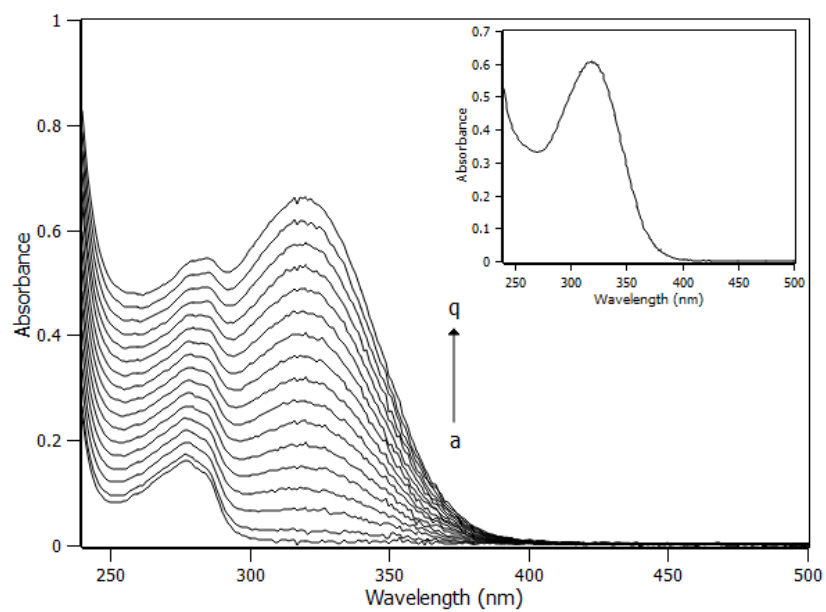

Figure S10: UV-Vis spectra of RSA with increments of  $2\mu\text{M}$  of PPL (a $\rightarrow$ q: from 0 to  $32\mu\text{M}$ ),  $[\text{RSA}] = 4\mu\text{M}$ . The inset shows the UV-Vis spectrum of PPL at  $32\mu\text{M}$  in buffer.
